# Supplementary material for: Active sites in modified copper catalysts for selective liquid phase dehydration of aqueous glycerol to acetol
Source: Royal Society of Chemistry journal article supplement (doi:10.1039/c3ra42348d), 2013-01-01
Supplement: c3ra42348d.pdf [file c3ra42348d.pdf]

Electronic Supplementary Information (ESI) for RSC Advances

This journal is © The Royal Society of Chemistry 2013

## **Active sites in modified copper based catalysts for selective liquid phase dehydration of aqueous glycerol to acetol**

**Rasika B. Mane, Aritomo Yamaguchi, Atul Malawadkar, Masayuki Shirai and Chandrashekhhar V. Rode\***

### **Experimental**

Powder X-ray diffraction of all the samples were carried out in a PANalytical X'pert Pro diffractometer using Cu K  $\alpha$  (1.5418 Å) radiations with a Ni filter and a X'celerator solid state detector . The crystallite size was determined by Scherrer equation.

$$D = k\lambda/\beta \cos \theta$$

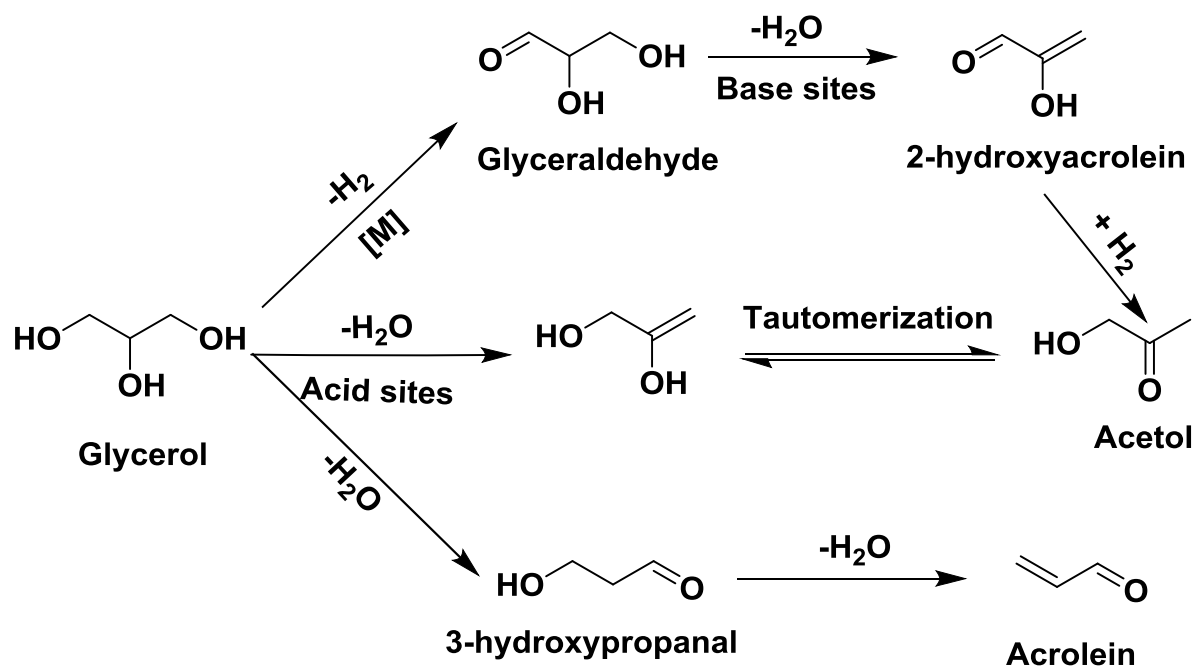

**Scheme 1.** Various glycerol dehydration pathways depending on acid and base sites of the catalysts.

**Table 1** Crystallite size of different activated (A) and recovered (R) copper catalysts

| Catalyst | Crystallite size of<br>Cu (nm) |
|----------|--------------------------------|
| ACu:Ba   | -                              |
| ACu:Mg   | 5.5                            |
| ACu:Zr   | 38.8                           |
| ACu:Zn   | -                              |
| ACu:Al   | 14.4                           |
| ANMT006  | 24.4                           |
| RCu:Ba   | 50.2                           |
| RCu:Mg   | 27.5                           |
| RCu:Zr   | 38.8                           |
| RCu:Zn   | 56.9                           |
| RCu:Al   | 35.6                           |

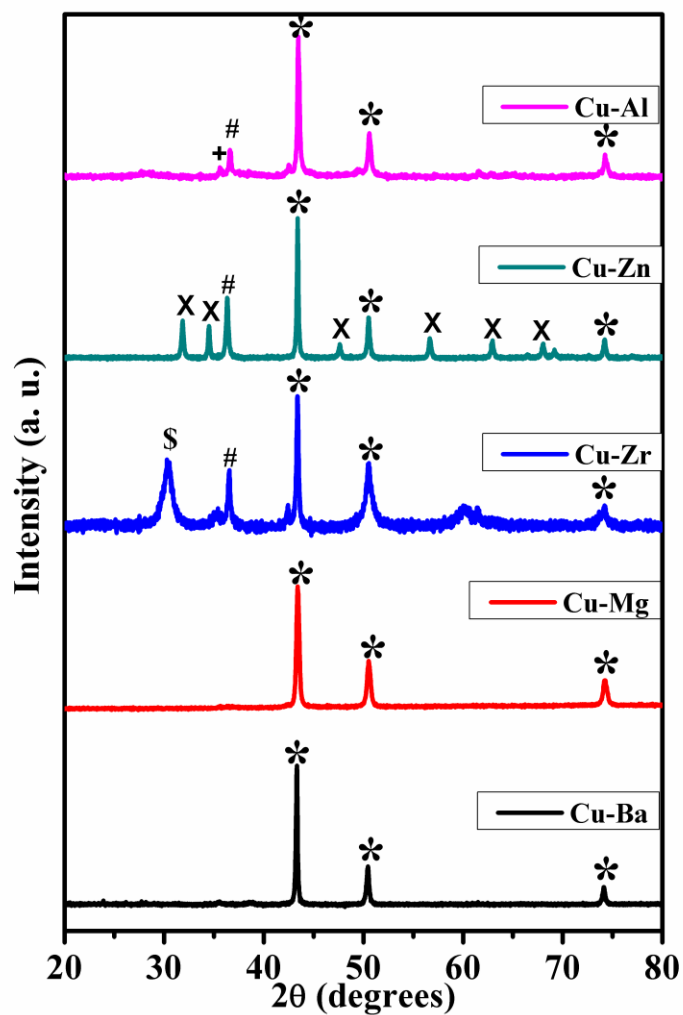

**Fig. 1** XRD patterns of different recovered copper catalysts. (\*)  $\text{Cu}^0$ , (#)  $\text{Cu}_2\text{O}$ , (+)  $\text{CuO}$ , (\$)  $t\text{-ZrO}_2$ , (X)  $\text{ZnO}$ .

**Table 2** NH<sub>3</sub>-TPD results of different copper catalysts

| Catalyst | Temperature at maximum (°C) | NH <sub>3</sub> desorbed (mL g <sup>-1</sup> ) |
|----------|-----------------------------|------------------------------------------------|
| Cu-Ba    | 334                         | 4.05                                           |
| Cu-Mg    | 325                         | 45.71                                          |
| Cu-Zr    | 564                         | 3.5                                            |
|          | 630                         | 5.9                                            |
| Cu-Zn    | 302                         | 7.52                                           |
| Cu-Al    | 564                         | 3.2                                            |
|          | 630                         | 6.31                                           |

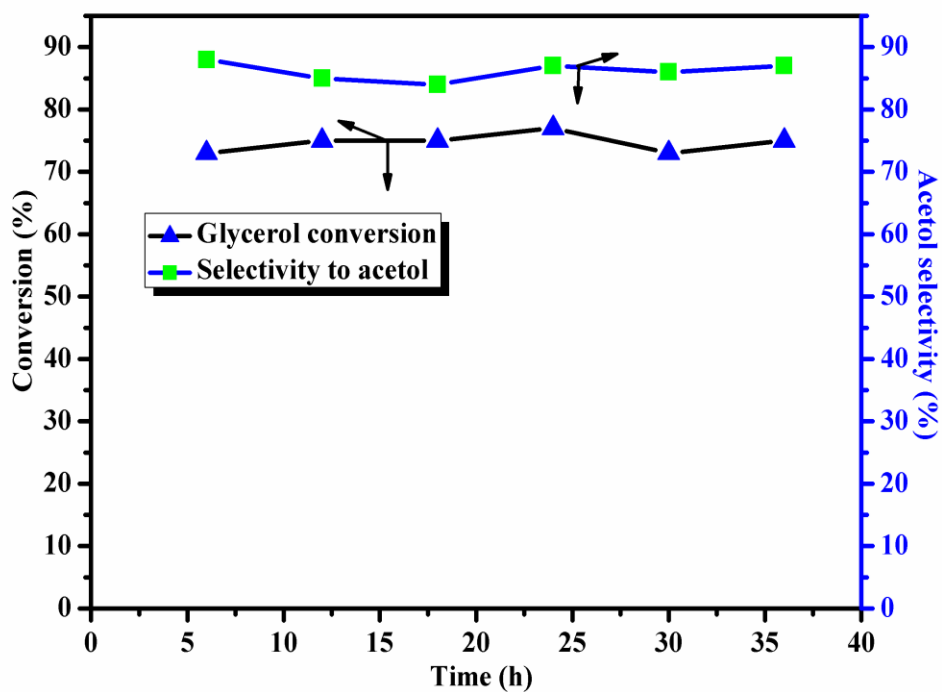

**Fig. 2** Time on stream activity of Cu-Al catalyst.

Reaction conditions: 20 wt% glycerol aqueous solution , without N<sub>2</sub> pressure, GHSV = 500 h<sup>-1</sup>,

LHSV = 1.53 h<sup>-1</sup>.
